# Supplementary material
Source: PubMed Central journal article supplement (PMC3400111)

# Supporting Information for: “Analysis of synthetic cannabinoids using high-resolution mass spectrometry and mass defect filtering: Implications for non-targeted screening of designer drugs”

Megan Grabenauer, Wojciech L. Krol, Jenny L. Wiley, Brian F. Thomas

Low CE, bottom, and high CE, top, mass spectra of indole derived synthetic cannabinoid standards.

JWH-200

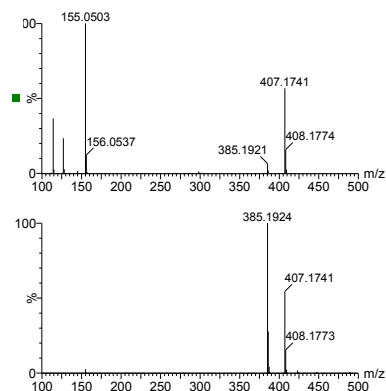

JWH-015

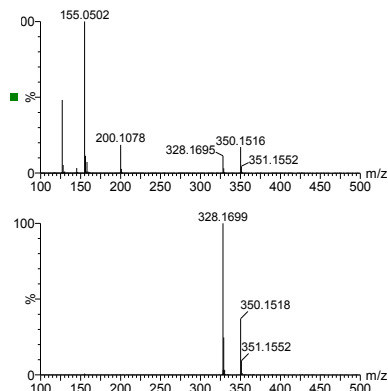

JWH-250

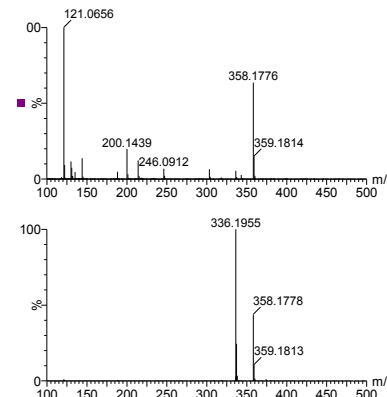

JWH-073

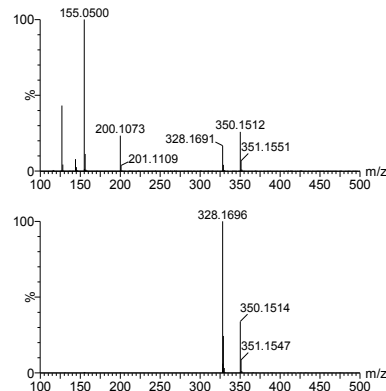

JWH-018

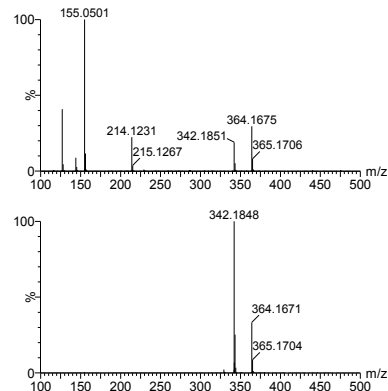

JWH-019

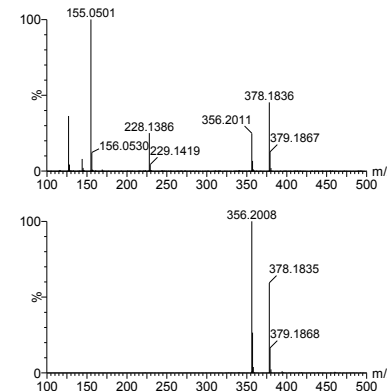

WIN 48,098

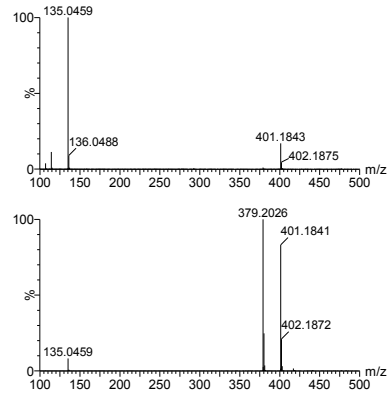

AM-694

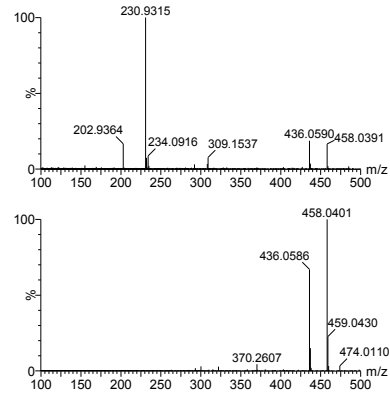

AM-2201

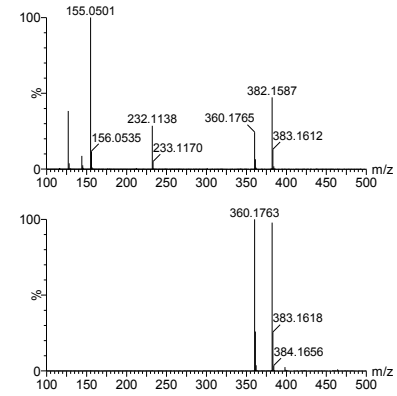

JWH-081

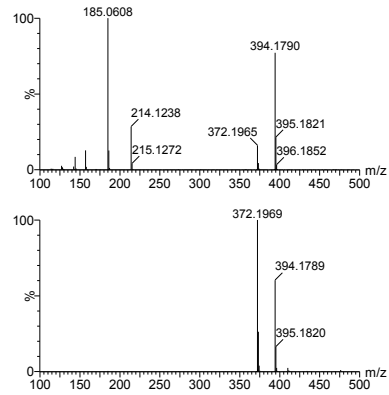

JWH-122

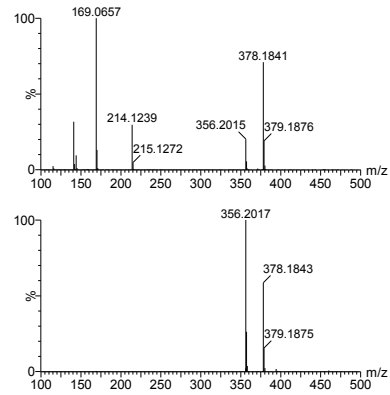

Supplement: NIHMS387917-supplement-1_si_001.pdf [file NIHMS387917-supplement-1_si_001.pdf]
